## RETRACTION

# Retraction: Unveiling the Nexus: Influence of learning motivation on organizational performance and innovative climate of Chinese firms

The *PLOS ONE* Editors

The *PLOS ONE* Editors retract this article [1, 2] because it was identified as one of a series of submissions for which we have concerns about the article's adherence to *PLOS ONE*'s Ethical Publishing Practice policies, including but not restricted to concerns about the authorship, ethics approvals, integrity of the underlying data, and reliability of the published results. We regret that the issues were not identified prior to the article's publication.

YuZ and QW did not agree with the retraction. CL, JL, YiZ, and SG either did not respond directly or could not be reached.

## References

1. Zhang Y, Liao C, Liu J, Zhang Y, Gui S, Wei Q (2024) Unveiling the Nexus: Influence of learning motivation on organizational performance and innovative climate of Chinese firms. *PLoS ONE* 19(5): e0304729. <https://doi.org/10.1371/journal.pone.0304729> PMID: 38820424
2. The *PLOS ONE* Staff (2024) Correction: Unveiling the Nexus: Influence of learning motivation on organizational performance and innovative climate of Chinese firms. *PLoS ONE* 19(7): e0308062. <https://doi.org/10.1371/journal.pone.0308062> PMID: 39052605

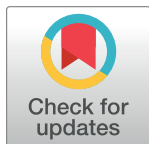

## OPEN ACCESS

**Citation:** The *PLOS ONE* Editors (2024) Retraction: Unveiling the Nexus: Influence of learning motivation on organizational performance and innovative climate of Chinese firms. *PLoS ONE* 19(12): e0316037. <https://doi.org/10.1371/journal.pone.0316037>

**Published:** December 13, 2024

**Copyright:** © 2024 The *PLOS ONE* Editors. This is an open access article distributed under the terms of the [Creative Commons Attribution License](https://creativecommons.org/licenses/by/4.0/), which permits unrestricted use, distribution, and reproduction in any medium, provided the original author and source are credited.
